# Supplementary material for: Single swim sessions in C. elegans induce key features of mammalian exercise
Source: PubMed Central journal article supplement (PMC5385602; doi:10.1186/s12915-017-0368-4), 2017-04-10

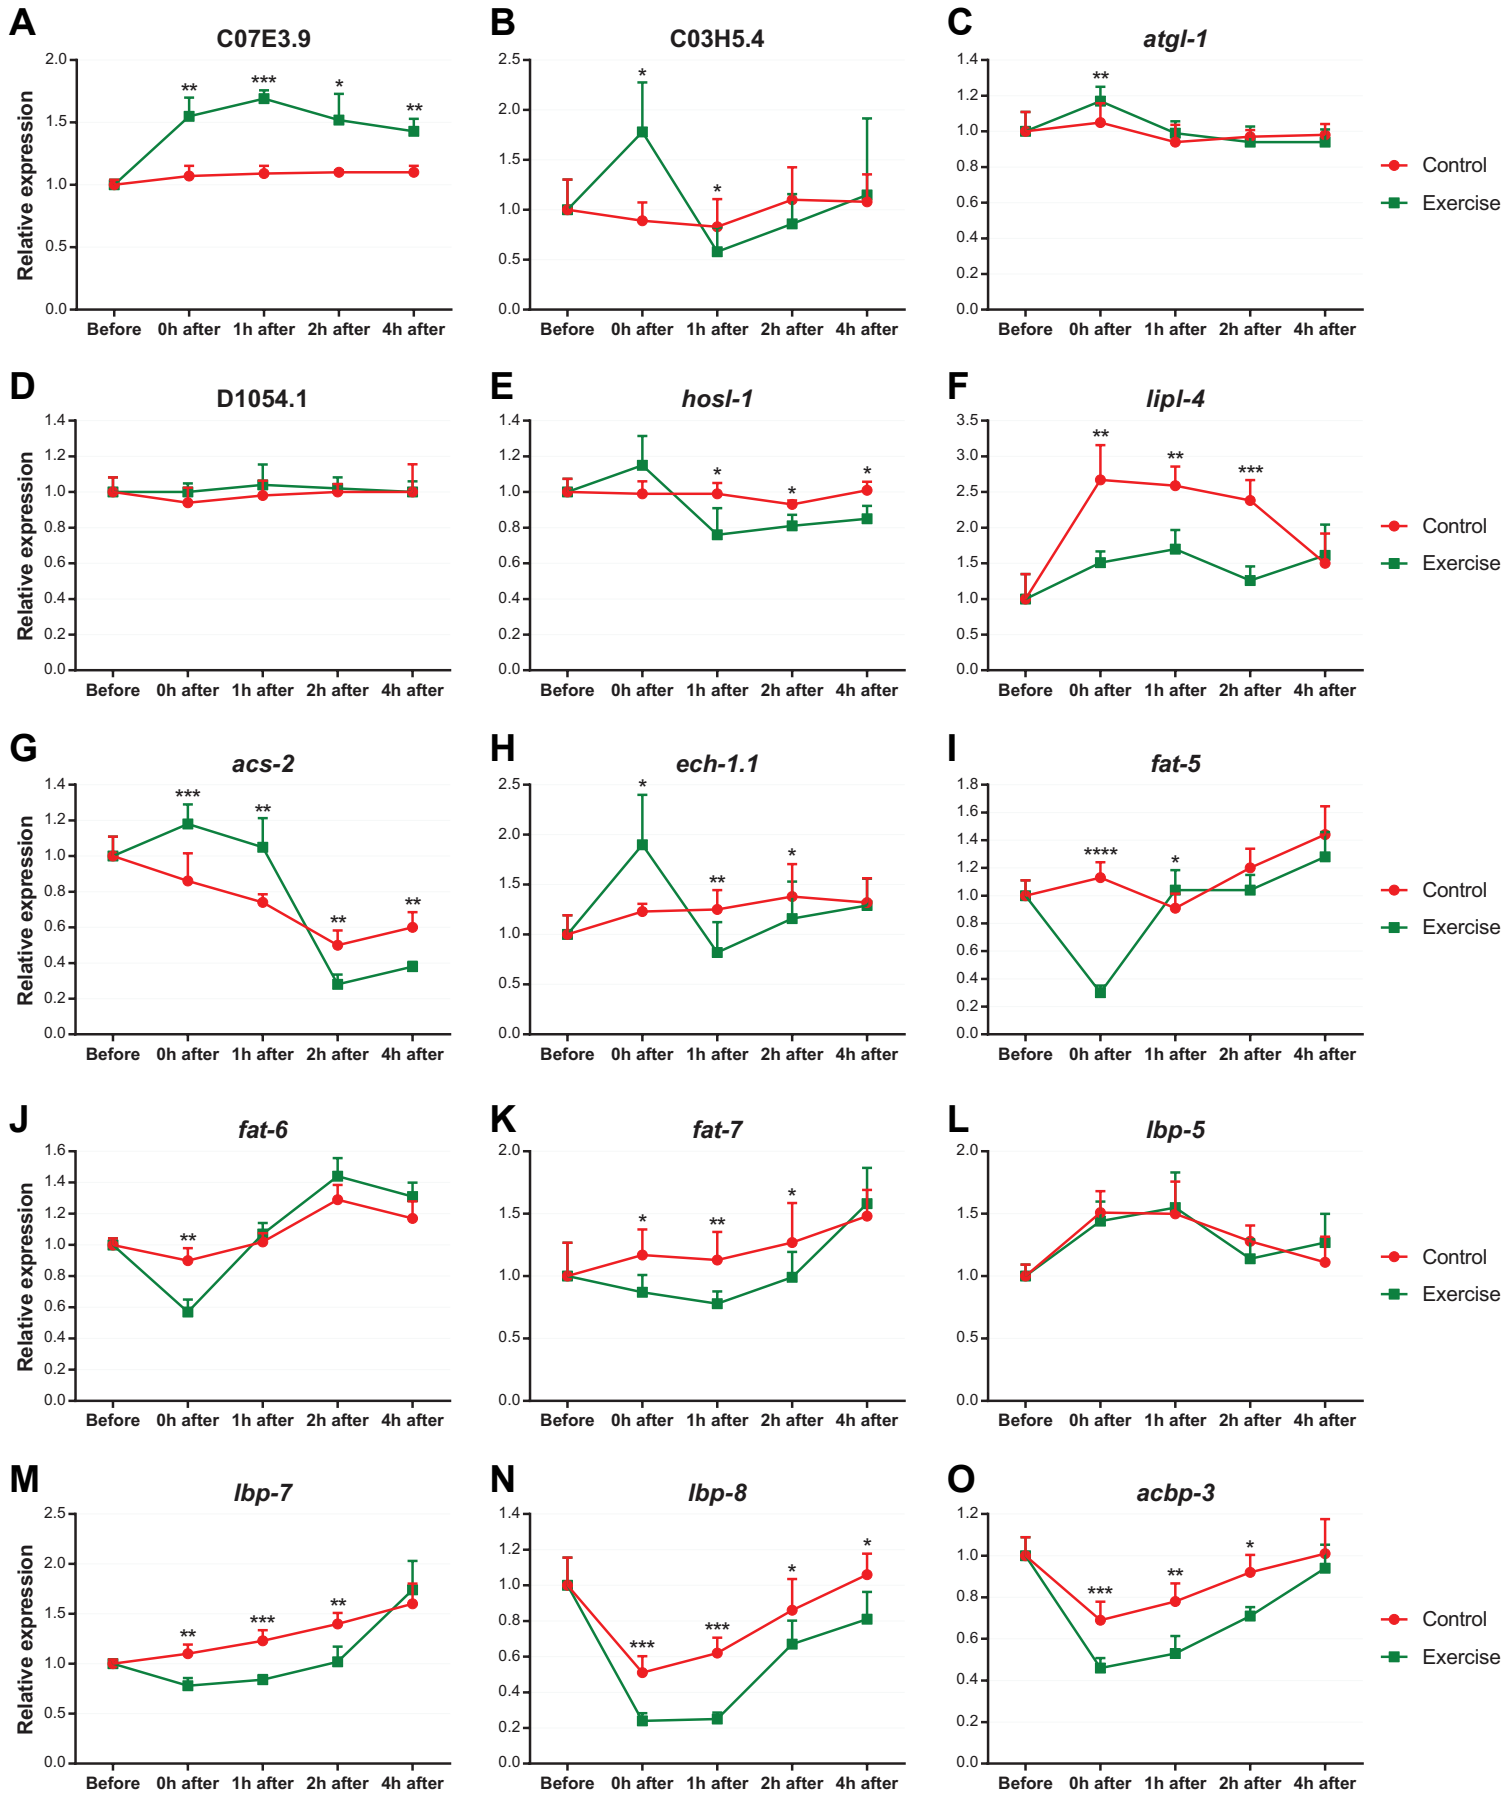

Supplement: 12915_2017_368_MOESM6_ESM.pdf [file 12915_2017_368_MOESM6_ESM.pdf]
